# Supplementary material for: Tumor-infiltrating mast cells are associated with resistance to anti-PD-1 therapy
Source: PubMed Central journal article supplement (PMC7804257; doi:10.1038/s41467-020-20600-7), 2021-01-12
Supplement: 41467_2020_20600_MOESM2_ESM.pdf [file 41467_2020_20600_MOESM2_ESM.pdf]

## Reporting Summary

Nature Research wishes to improve the reproducibility of the work that we publish. This form provides structure for consistency and transparency in reporting. For further information on Nature Research policies, see our [Editorial Policies](#) and the [Editorial Policy Checklist](#).

### Statistics

For all statistical analyses, confirm that the following items are present in the figure legend, table legend, main text, or Methods section.

n/a Confirmed

- |                                     |                                     |                                                                                                                                                                                                                                                            |
|-------------------------------------|-------------------------------------|------------------------------------------------------------------------------------------------------------------------------------------------------------------------------------------------------------------------------------------------------------|
| <input type="checkbox"/>            | <input checked="" type="checkbox"/> | The exact sample size ( $n$ ) for each experimental group/condition, given as a discrete number and unit of measurement                                                                                                                                    |
| <input type="checkbox"/>            | <input checked="" type="checkbox"/> | A statement on whether measurements were taken from distinct samples or whether the same sample was measured repeatedly                                                                                                                                    |
| <input type="checkbox"/>            | <input checked="" type="checkbox"/> | The statistical test(s) used AND whether they are one- or two-sided<br><i>Only common tests should be described solely by name; describe more complex techniques in the Methods section.</i>                                                               |
| <input checked="" type="checkbox"/> | <input type="checkbox"/>            | A description of all covariates tested                                                                                                                                                                                                                     |
| <input checked="" type="checkbox"/> | <input type="checkbox"/>            | A description of any assumptions or corrections, such as tests of normality and adjustment for multiple comparisons                                                                                                                                        |
| <input type="checkbox"/>            | <input checked="" type="checkbox"/> | A full description of the statistical parameters including central tendency (e.g. means) or other basic estimates (e.g. regression coefficient) AND variation (e.g. standard deviation) or associated estimates of uncertainty (e.g. confidence intervals) |
| <input type="checkbox"/>            | <input checked="" type="checkbox"/> | For null hypothesis testing, the test statistic (e.g. $F$ , $t$ , $r$ ) with confidence intervals, effect sizes, degrees of freedom and $P$ value noted<br><i>Give <math>P</math> values as exact values whenever suitable.</i>                            |
| <input checked="" type="checkbox"/> | <input type="checkbox"/>            | For Bayesian analysis, information on the choice of priors and Markov chain Monte Carlo settings                                                                                                                                                           |
| <input checked="" type="checkbox"/> | <input type="checkbox"/>            | For hierarchical and complex designs, identification of the appropriate level for tests and full reporting of outcomes                                                                                                                                     |
| <input checked="" type="checkbox"/> | <input type="checkbox"/>            | Estimates of effect sizes (e.g. Cohen's $d$ , Pearson's $r$ ), indicating how they were calculated                                                                                                                                                         |

*Our web collection on [statistics for biologists](#) contains articles on many of the points above.*

### Software and code

Policy information about [availability of computer code](#)

Data collection

Data analysis

For manuscripts utilizing custom algorithms or software that are central to the research but not yet described in published literature, software must be made available to editors and reviewers. We strongly encourage code deposition in a community repository (e.g. GitHub). See the Nature Research [guidelines for submitting code & software](#) for further information.

### Data

Policy information about [availability of data](#)

All manuscripts must include a [data availability statement](#). This statement should provide the following information, where applicable:

- Accession codes, unique identifiers, or web links for publicly available datasets
- A list of figures that have associated raw data
- A description of any restrictions on data availability

# Life sciences study design

All studies must disclose on these points even when the disclosure is negative.

|                 |                                                                                                                                                                                                                              |
|-----------------|------------------------------------------------------------------------------------------------------------------------------------------------------------------------------------------------------------------------------|
| Sample size     | Sample size was determined using Power analysis (R Statistical package) based on the tumor size variations with help from Dr. Liu, our Biostatistician.                                                                      |
| Data exclusions | In rare cases of unexpected animal deaths mid way through the experiment. Experiments involving drug therapy after tumor challenge there were some unexpected deaths.                                                        |
| Replication     | Every experiment was repeated at least 2x, all attempts in replicating the experiments were successful.                                                                                                                      |
| Randomization   | Humanized mice were randomized based on their human lymphocyte count and distributed into different experimental groups for the study. Only female mice were used in the study as CD34 take rate were better in female mice. |
| Blinding        | Tumor measurements were taken by an independent researcher who was not involved in treatment process. Cages were coded for treatment purposes and researcher measuring the tumor is not aware of the codes.                  |

## Reporting for specific materials, systems and methods

We require information from authors about some types of materials, experimental systems and methods used in many studies. Here, indicate whether each material, system or method listed is relevant to your study. If you are not sure if a list item applies to your research, read the appropriate section before selecting a response.

### Materials & experimental systems

| n/a                                 | Included in the study                                           |
|-------------------------------------|-----------------------------------------------------------------|
| <input type="checkbox"/>            | <input checked="" type="checkbox"/> Antibodies                  |
| <input type="checkbox"/>            | <input checked="" type="checkbox"/> Eukaryotic cell lines       |
| <input checked="" type="checkbox"/> | <input type="checkbox"/> Palaeontology and archaeology          |
| <input type="checkbox"/>            | <input checked="" type="checkbox"/> Animals and other organisms |
| <input type="checkbox"/>            | <input checked="" type="checkbox"/> Human research participants |
| <input checked="" type="checkbox"/> | <input type="checkbox"/> Clinical data                          |
| <input checked="" type="checkbox"/> | <input type="checkbox"/> Dual use research of concern           |

### Methods

| n/a                                 | Included in the study                           |
|-------------------------------------|-------------------------------------------------|
| <input checked="" type="checkbox"/> | <input type="checkbox"/> ChIP-seq               |
| <input type="checkbox"/>            | <input type="checkbox"/> Flow cytometry         |
| <input checked="" type="checkbox"/> | <input type="checkbox"/> MRI-based neuroimaging |

## Antibodies

|                 |                                                                                                                                                                                                                                                                                                                                                                                                                                                                                                                                                                                                                                                                                                                                                                                                                                                                                                                                                                                                                                                                                                                                                                                                                                                                                                                                                                                                                                                                                                                                                                                                                                                                                                                                                                                                                                                                                                                                                                                                                                                                                                                                                                                                                                                                                                                                                                                                                                                                                                                                                                                                                                                                                                                                                                                                                                                                                                                                                                                                                                                                                                                                                                                                                                                                                                                                                                                                                                                                                                                                                                                                                                                                                                                                   |
|-----------------|-----------------------------------------------------------------------------------------------------------------------------------------------------------------------------------------------------------------------------------------------------------------------------------------------------------------------------------------------------------------------------------------------------------------------------------------------------------------------------------------------------------------------------------------------------------------------------------------------------------------------------------------------------------------------------------------------------------------------------------------------------------------------------------------------------------------------------------------------------------------------------------------------------------------------------------------------------------------------------------------------------------------------------------------------------------------------------------------------------------------------------------------------------------------------------------------------------------------------------------------------------------------------------------------------------------------------------------------------------------------------------------------------------------------------------------------------------------------------------------------------------------------------------------------------------------------------------------------------------------------------------------------------------------------------------------------------------------------------------------------------------------------------------------------------------------------------------------------------------------------------------------------------------------------------------------------------------------------------------------------------------------------------------------------------------------------------------------------------------------------------------------------------------------------------------------------------------------------------------------------------------------------------------------------------------------------------------------------------------------------------------------------------------------------------------------------------------------------------------------------------------------------------------------------------------------------------------------------------------------------------------------------------------------------------------------------------------------------------------------------------------------------------------------------------------------------------------------------------------------------------------------------------------------------------------------------------------------------------------------------------------------------------------------------------------------------------------------------------------------------------------------------------------------------------------------------------------------------------------------------------------------------------------------------------------------------------------------------------------------------------------------------------------------------------------------------------------------------------------------------------------------------------------------------------------------------------------------------------------------------------------------------------------------------------------------------------------------------------------------|
| Antibodies used | Details of the antibodies used in the study are provided in Supplementary Tables 1 and 2. Dilutions used, Catalog number and the manufacturer is provided in these Tables.                                                                                                                                                                                                                                                                                                                                                                                                                                                                                                                                                                                                                                                                                                                                                                                                                                                                                                                                                                                                                                                                                                                                                                                                                                                                                                                                                                                                                                                                                                                                                                                                                                                                                                                                                                                                                                                                                                                                                                                                                                                                                                                                                                                                                                                                                                                                                                                                                                                                                                                                                                                                                                                                                                                                                                                                                                                                                                                                                                                                                                                                                                                                                                                                                                                                                                                                                                                                                                                                                                                                                        |
| Validation      | <p>All antibodies used in flow cytometry and IHC staining were based on manufacturer's recommended concentrations. They were tested on normal tissue/blood or melanoma tumor samples before used in the experimental assays. IHC antibody concentrations were fine tuned based on tissue origin to provide minimum background staining.</p> <p>Any new batches of antibodies were tested the same way before used in the experimental set up.</p> <ol style="list-style-type: none"> <li>1. PE/Dazzle™ 594 mouse anti-human CD3; clone OKT3, dilution 1:25, BioLegend 317346 (<a href="https://www.biolegend.com/en-us/products/pe-dazzle-594-anti-human-cd3-antibody-11986">https://www.biolegend.com/en-us/products/pe-dazzle-594-anti-human-cd3-antibody-11986</a>).</li> <li>2. BV786 mouse anti-human CD4; clone SK3, dilution 1:25, BD Biosciences 563877 (<a href="https://wwwbdbiosciences.com/us/applications/research/t-cell-immunology/th-1-cells/surface-markers/human/pe-cy7-mouse-anti-human-cd4-sk3-also-known-as-leu3a/p/560909">https://wwwbdbiosciences.com/us/applications/research/t-cell-immunology/th-1-cells/surface-markers/human/pe-cy7-mouse-anti-human-cd4-sk3-also-known-as-leu3a/p/560909</a>).</li> <li>3. Rat anti-human CD4; clone A161A1, 1:100, BioLegend 357402 (<a href="https://www.biolegend.com/en-us/products/purified-anti-human-cd4-antibody-8431">https://www.biolegend.com/en-us/products/purified-anti-human-cd4-antibody-8431</a>).</li> <li>4. PE-Cyanine7 mouse anti-human CD8a; clone SK1, 1:25, ThermoFisher 25-0087-41 (<a href="https://www.thermofisher.com/antibody/product/CD8a-Antibody-clone-SK1-Monoclonal/25-0087-41">https://www.thermofisher.com/antibody/product/CD8a-Antibody-clone-SK1-Monoclonal/25-0087-41</a>).</li> <li>5. Mouse anti-human CD8; clone SK1, 1:500, BioLegend 344702 (<a href="https://www.biolegend.com/en-us/products/purified-anti-human-cd8-antibody-6144">https://www.biolegend.com/en-us/products/purified-anti-human-cd8-antibody-6144</a>).</li> <li>6. APC-Cy™7 mouse anti-human CD11b; clone ICRF44, 1:25, BD Biosciences 557754 (<a href="https://wwwbdbiosciences.com/us/solrSearch?text=557754">https://wwwbdbiosciences.com/us/solrSearch?text=557754</a>).</li> <li>7. APC mouse anti-human CD11b; clone ICRF44, 1:25, BD Biosciences 550019 (<a href="https://wwwbdbiosciences.com/us/solrSearch?text=550019">https://wwwbdbiosciences.com/us/solrSearch?text=550019</a>).</li> <li>8. PE mouse anti-human CD14; clone 61-D3, 1:25, ThermoFisher 12-0149-41 (<a href="https://www.thermofisher.com/antibody/product/CD14-Antibody-clone-61D3-Monoclonal/12-0149-41">https://www.thermofisher.com/antibody/product/CD14-Antibody-clone-61D3-Monoclonal/12-0149-41</a>).</li> <li>9. PerCP-Cy5.5 mouse anti-human CD15; clone W6D3, 1:25, BioLegend 323020 (<a href="https://www.biolegend.com/en-us/products/percp-cyanine5-5-anti-human-cd15-ssea-1-antibody-4249">https://www.biolegend.com/en-us/products/percp-cyanine5-5-anti-human-cd15-ssea-1-antibody-4249</a>).</li> <li>10. Alexa Fluor 700 mouse anti-human CD20; clone 2H7, 1:50, ThermoFisher 56-0209-42 (<a href="https://www.thermofisher.com/antibody/product/CD20-Antibody-clone-2H7-Monoclonal/56-0209-42">https://www.thermofisher.com/antibody/product/CD20-Antibody-clone-2H7-Monoclonal/56-0209-42</a>).</li> <li>11. Mouse anti-human CD20cy; clone L26, 1:100, Dako M0755 (<a href="https://www.agilent.com/en/product/immunohistochemistry/antibodies-controls/primary-antibodies/cd20cy-(dako-omnis)-76218">https://www.agilent.com/en/product/immunohistochemistry/antibodies-controls/primary-antibodies/cd20cy-(dako-omnis)-76218</a>).</li> </ol> |

12. PE-Cy7 mouse anti-human CD33; P67.6, 1:25, BD Biosciences 333946 (<https://wwwbdbiosciences.com/us/solrSearch?text=333946>).
13. APC mouse anti-human CD45; clone 2D1, 1:50, ThermoFisher 17-9459-41 (<https://www.thermofisher.com/antibody/product/CD45-Antibody-clone-2D1-Monoclonal/17-9459-41>).
14. FITC rat anti-human CD45; clone 30-F11, 1:25, ThermoFisher 11-0451-82 (<https://www.thermofisher.com/antibody/product/CD45-Antibody-clone-30-F11-Monoclonal/11-0451-82>).
15. Mouse anti-human CD45; clone 2B11, 1:300, Dako M070101-2 ([https://www.agilent.com/en/product/immunohistochemistry/antibodies-controls/primary-antibodies/cd45-leucocyte-common-antigen-\(dako-omnis\)-76270](https://www.agilent.com/en/product/immunohistochemistry/antibodies-controls/primary-antibodies/cd45-leucocyte-common-antigen-(dako-omnis)-76270)).
16. BV605 mouse anti-human CD56; clone NCAM16.2 ,1:25, BD Biosciences 562780 (<https://wwwbdbiosciences.com/us/applications/research/stem-cell-research/hematopoietic-stem-cell-markers/human/negative-markers/bv605-mouse-anti-human-cd56-ncam162-also-known-as-ncam-16/p/562780>).
17. Mouse anti-human CD68; clone Y1/82A, 1:400, BioLegend 333801 (<https://www.biolegend.com/en-us/products/purified-anti-human-cd68-antibody-4835>).
18. Rabbit anti human CXCL10, 1:100, ThermoFisher PA5-79103 (<https://www.thermofisher.com/antibody/product/CXCL10-IP-10-Antibody-Polyclonal/PA5-79103>).
19. Mouse anti-human CXCR3; clone 49801, 1:50, R&D Systems MAB160-100 ([https://www.rndsystems.com/products/human-cxcr3-antibody-49801\\_mab160](https://www.rndsystems.com/products/human-cxcr3-antibody-49801_mab160)).
20. FITC mouse anti-human HLA-DR; clone G46-6, 1:25, BD Biosciences 555811 (<https://wwwbdbiosciences.com/us/applications/research/stem-cell-research/mesenchymal-stem-cell-markers-bone-marrow/human/negative-markers/fitc-mouse-anti-human-hla-dr-g46-6/p/555811>).
21. Rabbit anti-human HLA class I, 1:50, MyBiosource MBS2524608 (<https://www.mybiosource.com/polyclonal-human-antibody/hla-class-i/2524608>).
22. Mouse anti-human HMB45; clone HMB-45, 1:50, Dako M0634 ([https://www.agilent.com/cs/library/packageinsert/public/303299EFG\\_03.pdf](https://www.agilent.com/cs/library/packageinsert/public/303299EFG_03.pdf)).
23. Mouse anti-human mast cell tryptase, 1:100, BioLegend 369402 (<https://www.biolegend.com/en-us/products/purified-anti-human-mast-cell-tryptase-antibody-12681>).
24. FITC mouse anti-MHC Class I (H-2Kb); clone AF6-88.5.5.3, 1:25, ThermoFisher 11-5958-82 (<https://www.thermofisher.com/antibody/product/MHC-Class-I-H-2Kb-Antibody-clone-AF6-88-5-5-3-Monoclonal/11-5958-82>).
25. Mouse anti-human TCR gamma/delta; clone B6, 1:50, ThermoFisher 331402 (<https://www.thermofisher.com/antibody/product/Rabbit-anti-Goat-IgG-H-L-Secondary-Antibody-Polyclonal/31402>).
26. Donkey anti-mouse IgG; Qdot625, 1:500, ThermoFisher Q22085 (<https://www.thermofisher.com/antibody/product/Donkey-anti-Mouse-IgG-H-L-Secondary-Antibody-Polyclonal/Q22085>).
27. Alexa Fluor 488 goat anti-mouse IgG1, 1:50, ThermoFisher A-21121 (<https://www.thermofisher.com/antibody/product/Goat-anti-Mouse-IgG1-Cross-Adsorbed-Secondary-Antibody-Polyclonal/A-21121>).
28. Alexa Fluor 647 goat anti-mouse IgG2a, 1:50, ThermoFisher A-21241 (<https://www.thermofisher.com/antibody/product/Goat-anti-Mouse-IgG2a-Cross-Adsorbed-Secondary-Antibody-Polyclonal/A-21241>).
29. Alexa Fluor 647 goat anti-mouse IgG ,1:50, ThermoFisher A-21236 (<https://www.thermofisher.com/antibody/product/Goat-anti-Mouse-IgG-H-L-Highly-Cross-Adsorbed-Secondary-Antibody-Polyclonal/A-212360>).
30. Alexa Fluor 546 goat anti-rabbit IgG (H+L), 1:50, ThermoFisher A-11035 (<https://www.thermofisher.com/antibody/product/Goat-anti-Rabbit-IgG-H-L-Highly-Cross-Adsorbed-Secondary-Antibody-Polyclonal/A-11035>).
31. Mouse anti-human CD45RO; clone UCHL1, 1:300 , BioLegend 304202 (<https://www.biolegend.com/en-us/products/purified-anti-human-cd45ro-antibody-860>).
32. Mouse anti-human Granzyme B; clone 12F9B65, 1:600 , BioLegend 662801 (<https://www.biolegend.com/en-us/products/purified-anti-granzyme-b-antibody-10419>).
33. Mouse anti-human FOXP3; clone 259D, 1:25, BioLegend 320201 (<https://www.biolegend.com/en-us/products/purified-anti-human-foxp3-antibody-2903>).
34. Mouse anti-human Nestin; clone 10C2, 1:300, BioLegend 656802 (<https://www.biolegend.com/en-us/products/purified-anti-nestin-antibody-8836>).

## Eukaryotic cell lines

Policy information about [cell lines](#)

|                                                                   |                                                                                                                 |
|-------------------------------------------------------------------|-----------------------------------------------------------------------------------------------------------------|
| Cell line source(s)                                               | Tumor cell lines were originally obtained from ATCC (A375) or previously established at Wistar (WM3629, 451LU). |
| Authentication                                                    | All cell lines were tested for short tandem repeat profile (DNA identity) before use in the experiments.        |
| Mycoplasma contamination                                          | All cell lines were tested for mycoplasma negativity before use in the experiments.                             |
| Commonly misidentified lines (See <a href="#">ICLAC</a> register) | none used.                                                                                                      |

## Animals and other organisms

Policy information about [studies involving animals](#); [ARRIVE guidelines](#) recommended for reporting animal research

|                    |                                                                                                                                                                                                                                                                                      |
|--------------------|--------------------------------------------------------------------------------------------------------------------------------------------------------------------------------------------------------------------------------------------------------------------------------------|
| Laboratory animals | Immunodeficient NSG female mice (6-8 weeks) that are bred at Wistar were used for the study. Humanized mice were generated in house using NSG mice. All animal protocols were approved by IACUC. Details on housing conditions are provided in the Method section of the manuscript. |
| Wild animals       | No wild animals were used.                                                                                                                                                                                                                                                           |

Field-collected samples

Ethics oversight

Note that full information on the approval of the study protocol must also be provided in the manuscript.

## Human research participants

Policy information about [studies involving human research participants](#)

Population characteristics

Recruitment

Ethics oversight

Note that full information on the approval of the study protocol must also be provided in the manuscript.

## Flow Cytometry

### Plots

Confirm that:

- The axis labels state the marker and fluorochrome used (e.g. CD4-FITC).
- The axis scales are clearly visible. Include numbers along axes only for bottom left plot of group (a 'group' is an analysis of identical markers).
- All plots are contour plots with outliers or pseudocolor plots.
- A numerical value for number of cells or percentage (with statistics) is provided.

### Methodology

Sample preparation

Instrument

Software

Cell population abundance

Gating strategy

- Tick this box to confirm that a figure exemplifying the gating strategy is provided in the Supplementary Information.
